# Supplementary material for: Loss of TMEM106B potentiates lysosomal and FTLD‐like pathology in progranulin‐deficient mice
Source: PubMed Central journal article supplement — EMBO Rep. 2020 Sep 14;21(10):e50241. doi: 10.15252/embr.202050241 (PMC7534633; doi:10.15252/embr.202050241), 2020-09-14
Supplement: EMBR-21-e50241-s004.pdf [file EMBR-21-e50241-s004.pdf]

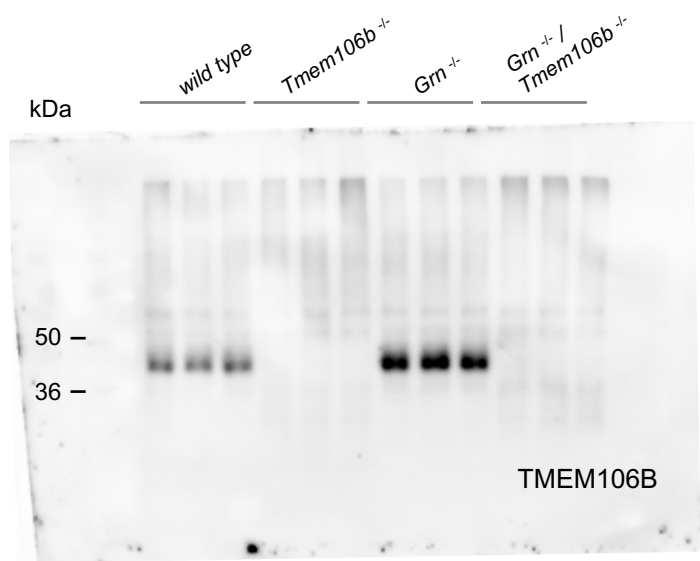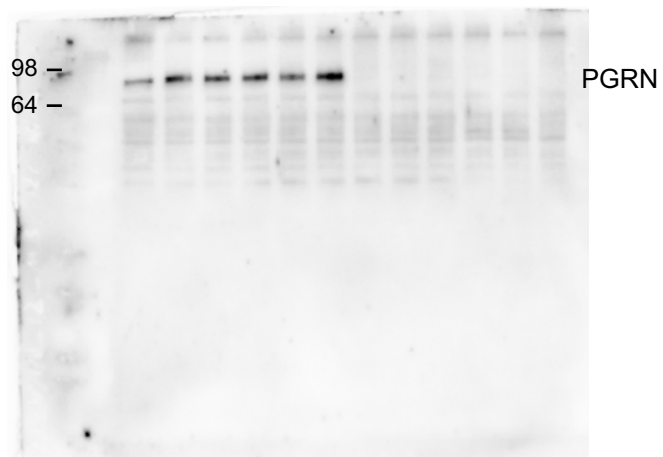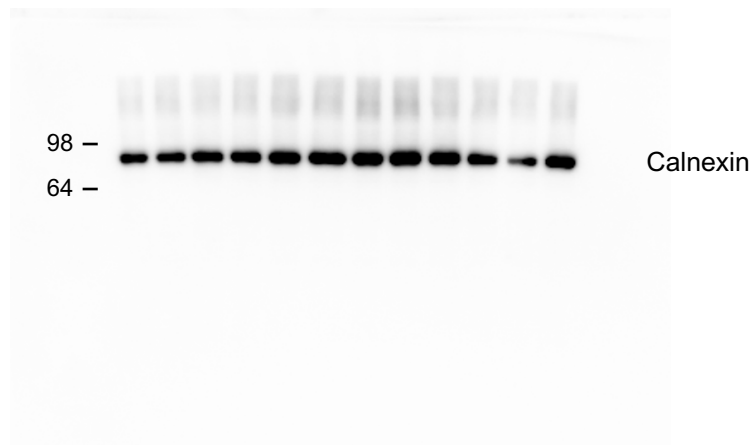

## Rotarod performance duration in seconds

|                                                   | Animals    | Run A            | Run B        | Run C   |                  | Average | Age at test in days |
|---------------------------------------------------|------------|------------------|--------------|---------|------------------|---------|---------------------|
| <b>Wild type</b>                                  | 1          | 62               | 123          | 131,8   | █                | 105,6   | 129                 |
|                                                   | 2          | 54,1             | 83,7         | 99,9    | █                | 79,2    | 129                 |
|                                                   | 3          | 77,1             | 98,4         | 64,1    | █                | 79,9    | 94                  |
|                                                   | 4          | 106,6            | 74           | 98,4    | █                | 93,0    | 94                  |
|                                                   | 5          | 80,5             | 72,4         | 91,6    | █                | 81,5    | 94                  |
|                                                   | 6          | 65,2             | 77,8         | 68,3    | █                | 70,4    | 94                  |
|                                                   | 7          | 63,8             | 89           | 80      | █                | 77,6    | 129                 |
|                                                   | 8          | 90,3             | 114          | 68,5    | █                | 90,9    | 141                 |
|                                                   | 9          | 63,6             | 37,3         | 27,5    | █                | 42,8    | 141                 |
|                                                   | 10         | 77,6             | 76           | 103,2   | █                | 85,6    | 141                 |
| <b>TMEM106B -/-</b>                               | 1          | 67,1             | 104,9        | 158,4   | █                | 110,1   | 141                 |
|                                                   | 2          | 60               | 78,1         | 85,6    | █                | 74,6    | 141                 |
|                                                   | 3          | 91,7             | 57,8         | 57,5    | █                | 69,0    | 101                 |
|                                                   | 4          | 71,1             | 33,4         | 70      | █                | 58,2    | 101                 |
|                                                   | 5          | 38,7             | 81           | 57,4    | █                | 59,0    | 101                 |
|                                                   | 6          | 70,1             | 30,4         | 36,1    | █                | 45,5    | 104                 |
|                                                   | 7          | 54,8             | 20,8         | 44,2    | █                | 39,9    | 104                 |
|                                                   | 8          | 81,4             | 73,2         | 105,2   | █                | 86,6    | 104                 |
|                                                   | 9          | 72,5             | 47,9         | 73,7    | █                | 64,7    | 104                 |
|                                                   | 10         | 82,6             | 62           | 83,5    | █                | 76,0    | 104                 |
|                                                   | 11         | 60,2             | 29,7         | 35,2    | █                | 41,7    | 89                  |
|                                                   | 12         | 50,8             | 30,9         | 50,2    | █                | 44,0    | 95                  |
| <b>GRN -/-</b>                                    | 1          | 54,4             | 126,8        | 91,1    | █                | 90,8    | 106                 |
|                                                   | 2          | 45,9             | 29,9         | 59,8    | █                | 45,2    | 122                 |
|                                                   | 3          | 53,4             | 55,3         | 74,6    | █                | 61,1    | 122                 |
|                                                   | 4          | 63,5             | 98           | 71      | █                | 77,5    | 122                 |
|                                                   | 5          | 57,9             | 99,3         | 112,6   | █                | 89,9    | 122                 |
| <b>Grn +/- &amp; Tmem106b -/-</b>                 | 1          | 51,9             | 31,6         | 44,9    | █                | 42,8    | 95                  |
|                                                   | 2          | 41,1             | 55,3         | 57,2    | █                | 51,2    | 95                  |
|                                                   | 3          | 37,2             | 53,7         | 73,3    | █                | 54,7    | 95                  |
|                                                   | 4          | 32,2             | 29,2         | 44,8    | █                | 35,4    | 95                  |
|                                                   | 5          | 40,3             | 19,2         | 77,6    | █                | 45,7    | 95                  |
|                                                   | 6          | 46,9             | 52,4         | 45,1    | █                | 48,1    | 134                 |
|                                                   | 7          | 50,8             | 24,7         | 40,8    | █                | 38,8    | 134                 |
| <b>Grn -/- &amp; Tmem106b -/-</b>                 | 1          | 4,2              | 6,5          | 7,4     | █                | 6,0     | 92                  |
|                                                   | 2          | 6,1              | 3,4          | 7,4     | █                | 5,6     | 89                  |
|                                                   | 3          | 3,8              | 3,1          | 7,2     | █                | 4,7     | 95                  |
|                                                   |            | 95,00% CI of     |              |         |                  |         |                     |
| Tukey's multiple comparisons test                 | Mean Diff, | diff,            | Significant? | Summary | Adjusted P Value |         |                     |
| wild type vs. Tmem106b -/-                        | 16,54      | -4,286 to 37,37  | No           | ns      | 0,1729           | A-B     |                     |
| wild type vs. Grn -/-                             | 7,757      | -18,89 to 34,40  | No           | ns      | 0,9156           | A-C     |                     |
| wild type vs. Grn +/- & Tmem106b -/-              | 35,41      | 11,44 to 59,38   | Yes          | **      | 0,0014           | A-D     |                     |
| wild type vs. Grn -/- & Tmem106b -/-              | 75,2       | 43,18 to 107,2   | Yes          | ****    | <0,0001          | A-E     |                     |
| Tmem106b -/- vs. Grn -/-                          | -8,786     | -34,68 to 17,11  | No           | ns      | 0,8621           | B-C     |                     |
| Tmem106b -/- vs. Grn +/- & Tmem106b -/-           | 18,87      | -4,269 to 42,00  | No           | ns      | 0,1539           | B-D     |                     |
| Tmem106b -/- vs. Grn -/- & Tmem106b -/-           | 58,66      | 27,26 to 90,06   | Yes          | ****    | <0,0001          | B-E     |                     |
| Grn -/- vs. Grn +/- & Tmem106b -/-                | 27,65      | -0,8313 to 56,14 | No           | ns      | 0,0605           | C-D     |                     |
| Grn -/- vs. Grn -/- & Tmem106b -/-                | 67,44      | 31,92 to 103,0   | Yes          | ****    | <0,0001          | C-E     |                     |
| Grn +/- & Tmem106b -/- vs. Grn -/- & Tmem106b -/- | 39,79      | 6,224 to 73,36   | Yes          | *       | 0,0137           | D-E     |                     |
