# Supplementary material for: Loss of TMEM106B potentiates lysosomal and FTLD‐like pathology in progranulin‐deficient mice
Source: PubMed Central journal article supplement — EMBO Rep. 2020 Sep 14;21(10):e50241. doi: 10.15252/embr.202050241 (PMC7534633; doi:10.15252/embr.202050241), 2020-09-14
Supplement: EMBR-21-e50241-s007.pdf [file EMBR-21-e50241-s007.pdf]

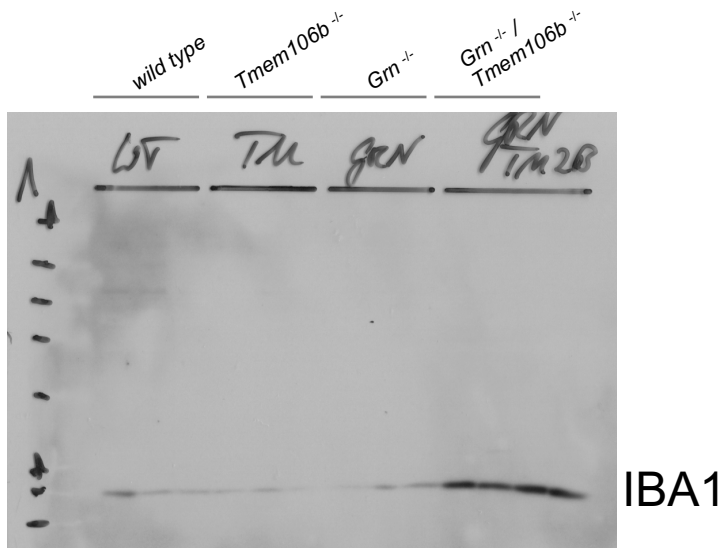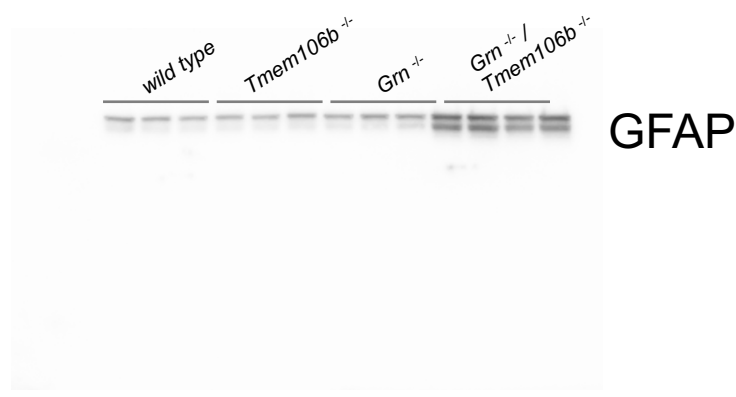

| Figure | Protein | Normalized to WT |                   |                    |                         | Protein | Raw Data |                   |                    |                                                                          |                                   |                                                            |                    |                  |         |                  |         |
|--------|---------|------------------|-------------------|--------------------|-------------------------|---------|----------|-------------------|--------------------|--------------------------------------------------------------------------|-----------------------------------|------------------------------------------------------------|--------------------|------------------|---------|------------------|---------|
| 4      | GFAP    | WT               | TM <sup>-/-</sup> | GRN <sup>-/-</sup> | GRN & TM <sup>-/-</sup> | GFAP    | WT       | TM <sup>-/-</sup> | GRN <sup>-/-</sup> | GRN & TM <sup>-/-</sup>                                                  | Tukey's multiple comparisons test | Mean Diff.                                                 | 95.00% CI of diff. | Significant?     | Summary | Adjusted P Value |         |
|        |         | A                | 115               | 87                 | 109                     | 361     | A        | 16.502.805        | 12.490.654         | 15.656.430                                                               | 51.658.141                        | wild type vs. Tmem106b <sup>-/-</sup>                      | 3                  | -64.14 to 70.14  | No      | ns               | 0.9989  |
|        |         | B                | 100               | 86                 | 118                     | 373     | B        | 14.267.879        | 12.361.677         | 16.861.591                                                               | 53.407.236                        | wild type vs. Grn <sup>-/-</sup>                           | -21.67             | -88.81 to 45.48  | No      | ns               | 0.7359  |
|        |         | C                | 85                | 118                | 138                     | 293     | C        | 12.189.901        | 16.875.298         | 19.817.527                                                               | 41.911.482                        | wild type vs. Grn <sup>-/-</sup> & Tmem106b <sup>-/-</sup> | -242.3             | -309.5 to -175.2 | Yes     | ****             | <0.0001 |
|        |         |                  |                   |                    |                         |         |          |                   |                    | Tmem106b <sup>-/-</sup> vs. Grn <sup>-/-</sup>                           | -24.67                            | -91.81 to 42.48                                            | No                 | ns               | 0.6568  |                  |         |
|        |         |                  |                   |                    |                         |         |          |                   |                    | Tmem106b <sup>-/-</sup> vs. Grn <sup>-/-</sup> & Tmem106b <sup>-/-</sup> | -245.3                            | -312.5 to -178.2                                           | Yes                | ****             | <0.0001 |                  |         |
|        |         |                  |                   |                    |                         |         |          |                   |                    | Grn <sup>-/-</sup> vs. Grn <sup>-/-</sup> & Tmem106b <sup>-/-</sup>      | -220.7                            | -287.8 to -153.5                                           | Yes                | ****             | <0.0001 |                  |         |
| 4      | IBA1    | WT               | TM <sup>-/-</sup> | GRN <sup>-/-</sup> | GRN & TM <sup>-/-</sup> | IBA1    | WT       | TM <sup>-/-</sup> | GRN <sup>-/-</sup> | GRN & TM <sup>-/-</sup>                                                  | Tukey's multiple comparisons test | Mean Diff.                                                 | 95.00% CI of diff. | Significant?     | Summary | Adjusted P Value |         |
|        |         | A                | 149               | 54                 | 100                     | 434     | A        | 2.546.901         | 917.734            | 1.704.645                                                                | 7.415.865                         | wild type vs. Tmem106b <sup>-/-</sup>                      | 36.67              | -102.6 to 176.0  | No      | ns               | 0.8329  |
|        |         | B                | 78                | 88                 | 100                     | 403     | B        | 1.337.155         | 1.506.906          | 1.706.478                                                                | 6.885.659                         | wild type vs. Grn <sup>-/-</sup>                           | -23                | -162.3 to 116.3  | No      | ns               | 0.9496  |
|        |         | C                | 73                | 48                 | 169                     | 566     | C        | 1.242.762         | 823.790            | 2.896.290                                                                | 9.664.371                         | wild type vs. Grn <sup>-/-</sup> & Tmem106b <sup>-/-</sup> | -367.7             | -507.0 to -228.4 | Yes     | ***              | 0.0001  |
|        |         |                  |                   |                    |                         |         |          |                   |                    | Tmem106b <sup>-/-</sup> vs. Grn <sup>-/-</sup>                           | -59.67                            | -199.0 to 79.62                                            | No                 | ns               | 0.5482  |                  |         |
|        |         |                  |                   |                    |                         |         |          |                   |                    | Tmem106b <sup>-/-</sup> vs. Grn <sup>-/-</sup> & Tmem106b <sup>-/-</sup> | -404.3                            | -543.6 to -265.0                                           | Yes                | ****             | <0.0001 |                  |         |
|        |         |                  |                   |                    |                         |         |          |                   |                    | Grn <sup>-/-</sup> vs. Grn <sup>-/-</sup> & Tmem106b <sup>-/-</sup>      | -344.7                            | -484.0 to -205.4                                           | Yes                | ***              | 0.0002  |                  |         |

Source data Figure 4
