# Supplementary material for: Loss of TMEM106B potentiates lysosomal and FTLD‐like pathology in progranulin‐deficient mice
Source: PubMed Central journal article supplement — EMBO Rep. 2020 Sep 14;21(10):e50241. doi: 10.15252/embr.202050241 (PMC7534633; doi:10.15252/embr.202050241), 2020-09-14
Supplement: EMBR-21-e50241-s008.pdf [file EMBR-21-e50241-s008.pdf]

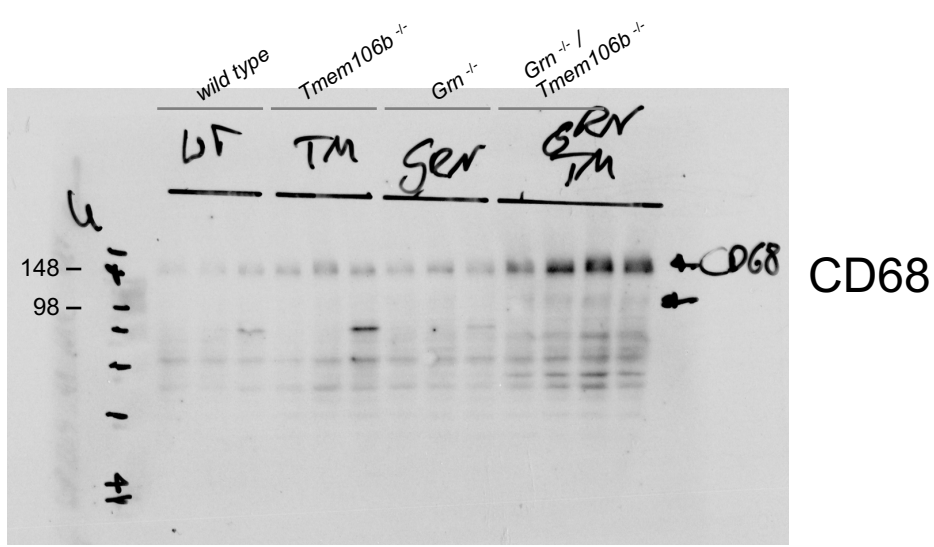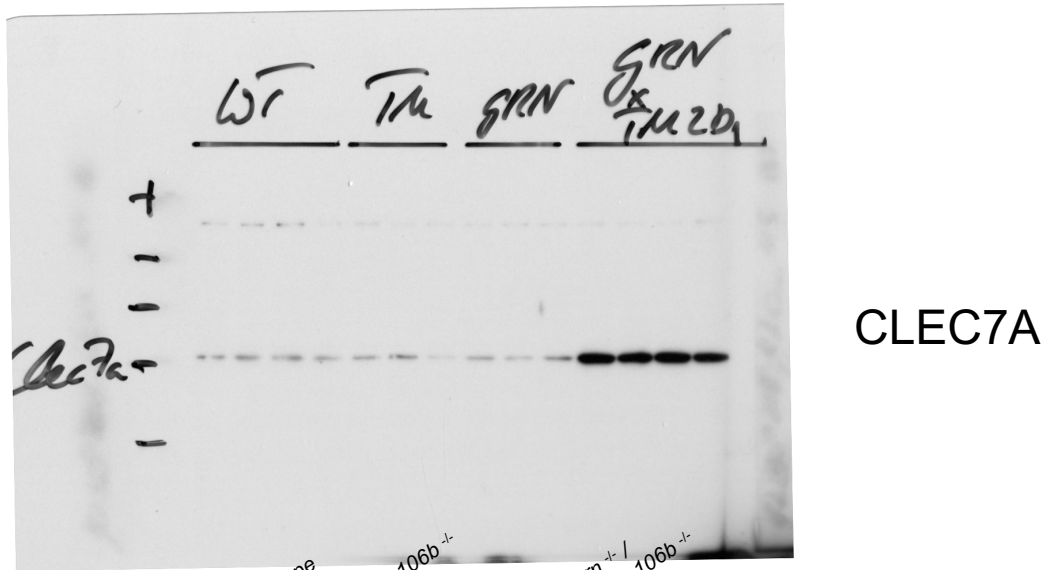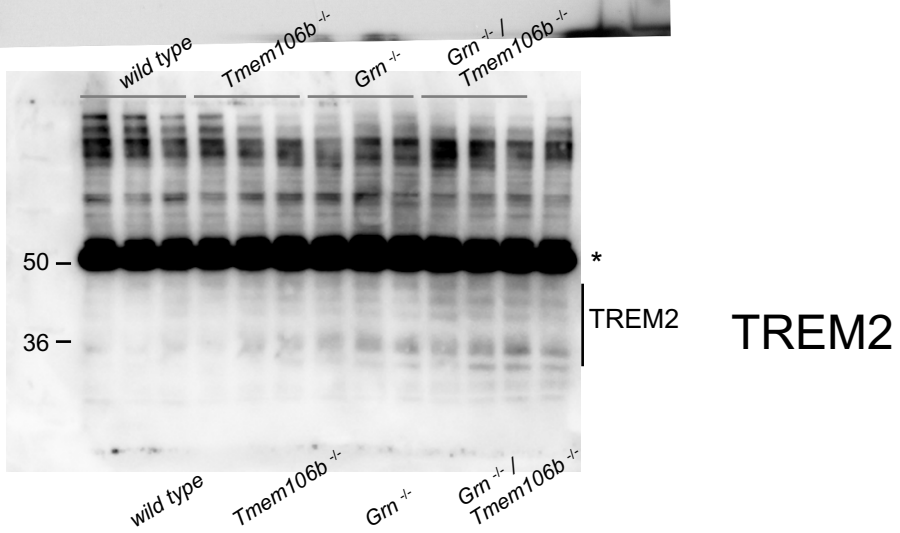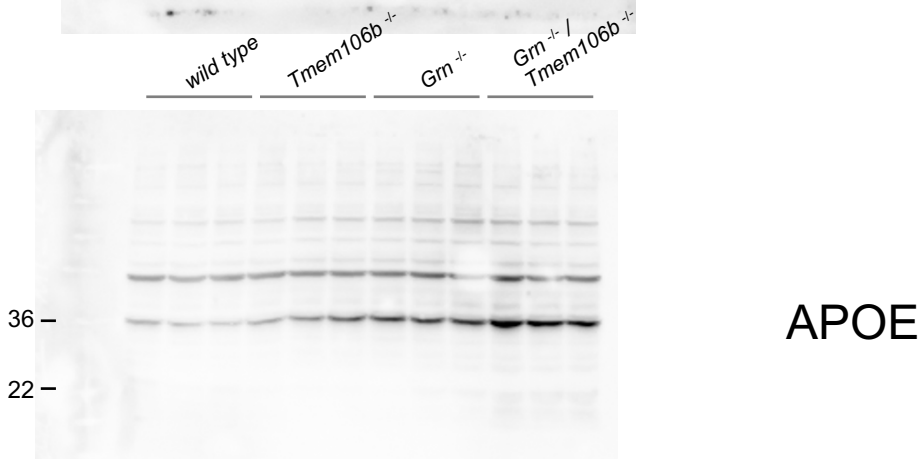

| Figure | Protein | Normalized to WT |        |         |              | Protein | Raw Data |        |           |              |            |            |                                      |                                        |                    |                  |         |                  |         |
|--------|---------|------------------|--------|---------|--------------|---------|----------|--------|-----------|--------------|------------|------------|--------------------------------------|----------------------------------------|--------------------|------------------|---------|------------------|---------|
|        |         | WT               | TM -/- | GRN -/- | GRN & TM -/- |         | WT       | TM -/- | GRN -/-   | GRN & TM -/- |            |            |                                      |                                        |                    |                  |         |                  |         |
| 5      | CD68    | WT               | 122    | 65      | 115          | 308     | CD68     | WT     | 2.026.792 | 1.077.598    | 1.905.754  | 5.120.192  | Tukey's multiple comparisons test    | Mean Diff.                             | 95.00% CI of diff. | Significant?     | Summary | Adjusted P Value |         |
|        |         | A                | 84     | 117     | 155          | 357     |          | A      | 1.398.558 | 1.933.735    | 2.571.141  | 5.920.401  | wild type vs. Tmem106b -/-           | -21.66                                 | -150.3 to 107.0    | No               | ns      | 0.9469           |         |
|        |         | B                | 94     | 184     | 172          | 446     |          | B      | 1.553.803 | 3.046.234    | 2.861.407  | 7.407.261  | wild type vs. Grn -/-                | -47.38                                 | -176.0 to 81.29    | No               | ns      | 0.6553           |         |
|        |         | C                |        |         |              |         |          | C      |           |              |            |            | wild type vs. Grn -/- & Tmem106b -/- | -270.5                                 | -399.2 to -141.8   | Yes              | ***     | 0.0007           |         |
|        |         |                  |        |         |              |         |          |        |           |              |            |            | Tmem106b -/- vs. Grn -/-             | -25.72                                 | -154.4 to 103.0    | No               | ns      | 0.9161           |         |
|        |         |                  |        |         |              |         |          |        |           |              |            |            |                                      | Tmem106b -/- vs. Grn -/ & Tmem106b -/- | -248.8             | -377.5 to -120.2 | Yes     | **               | 0.0012  |
|        |         |                  |        |         |              |         |          |        |           |              |            |            |                                      | Grn -/- vs. Grn -/ & Tmem106b -/-      | -223.1             | -351.8 to -94.46 | Yes     | **               | 0.0024  |
| 5      | Clec7   | WT               | 106    | 74      | 72           | 871     | Clec7    | WT     | 2.627.791 | 1.835.106    | 1.786.620  | 21.542.083 | Tukey's multiple comparisons test    | Mean Diff.                             | 95.00% CI of diff. | Significant?     | Summary | Adjusted P Value |         |
|        |         | A                | 117    | 91      | 53           | 726     |          | A      | 2.898.581 | 2.242.291    | 1.313.440  | 17.964.894 | wild type vs. Tmem106b -/-           | 34.67                                  | -82.77 to 152.1    | No               | ns      | 0.7825           |         |
|        |         | B                | 77     | 31      | 115          | 834     |          | B      | 1.893.273 | 770.475      | 2.837.989  | 20.632.576 | wild type vs. Grn -/-                | 20                                     | -97.43 to 137.4    | No               | ns      | 0.9452           |         |
|        |         | C                |        |         |              |         |          | C      |           |              |            |            | wild type vs. Grn -/ & Tmem106b -/-  | -710.3                                 | -827.8 to -592.9   | Yes              | ****    | <0.0001          |         |
|        |         |                  |        |         |              |         |          |        |           |              |            |            | Tmem106b -/- vs. Grn -/-             | -14.67                                 | -132.1 to 102.8    | No               | ns      | 0.9769           |         |
|        |         |                  |        |         |              |         |          |        |           |              |            |            |                                      | Tmem106b -/- vs. Grn -/ & Tmem106b -/- | -745               | -862.4 to -627.6 | Yes     | ****             | <0.0001 |
|        |         |                  |        |         |              |         |          |        |           |              |            |            |                                      | Grn -/- vs. Grn -/ & Tmem106b -/-      | -730.3             | -847.8 to -612.9 | Yes     | ****             | <0.0001 |
| 5      | TREM2   | WT               | 108    | 102     | 271          | 355     | TREM2    | WT     | 8.011.019 | 7.559.820    | 20.031.032 | 26.275.649 | Tukey's multiple comparisons test    | Mean Diff.                             | 95.00% CI of diff. | Significant?     | Summary | Adjusted P Value |         |
|        |         | A                | 69     | 167     | 289          | 406     |          | A      | 5.121.216 | 12.395.077   | 21.401.106 | 30.046.753 | wild type vs. Tmem106b -/-           | -60.33                                 | -174.7 to 54.08    | No               | ns      | 0.3882           |         |
|        |         | B                | 123    | 212     | 242          | 469     |          | B      | 9.071.493 | 15.665.774   | 17.908.555 | 34.727.926 | wild type vs. Grn -/-                | -167.3                                 | -281.7 to -52.92   | Yes              | **      | 0.0068           |         |
|        |         | C                |        |         |              |         |          | C      |           |              |            |            | wild type vs. Grn -/ & Tmem106b -/-  | -310                                   | -424.4 to -195.6   | Yes              | ***     | 0.0001           |         |
|        |         |                  |        |         |              |         |          |        |           |              |            |            | Tmem106b -/- vs. Grn -/-             | -107                                   | -221.4 to 7.412    | No               | ns      | 0.067            |         |
|        |         |                  |        |         |              |         |          |        |           |              |            |            |                                      | Tmem106b -/- vs. Grn -/ & Tmem106b -/- | -249.7             | -364.1 to -135.3 | Yes     | ***              | 0.0005  |
|        |         |                  |        |         |              |         |          |        |           |              |            |            |                                      | Grn -/- vs. Grn -/ & Tmem106b -/-      | -142.7             | -257.1 to -28.26 | Yes     | *                | 0.0168  |
| 5      | APOE    | WT               | 120    | 157     | 413          | 688     | APOE     | WT     | 5.602.603 | 6.809.851    | 17.926.274 | 29.877.996 | Tukey's multiple comparisons test    | Mean Diff.                             | 95.00% CI of diff. | Significant?     | Summary | Adjusted P Value |         |
|        |         | A                | 90     | 231     | 407          | 611     |          | A      | 3.899.903 | 10.057.518   | 17.677.672 | 26.562.852 | wild type vs. Tmem106b -/-           | -144.8                                 | -356.0 to 66.37    | No               | ns      | 0.2039           |         |
|        |         | B                | 81     | 346     | 484          | 452     |          | B      | 3.534.077 | 15.042.823   | 21.038.438 | 19.633.561 | wild type vs. Grn -/-                | -334.5                                 | -645.7 to -123.3   | Yes              | **      | 0.0042           |         |
|        |         | C                |        |         |              |         |          | C      |           |              |            |            | wild type vs. Grn -/ & Tmem106b -/-  | -483.6                                 | -694.8 to -272.4   | Yes              | ***     | 0.0004           |         |
|        |         |                  |        |         |              |         |          |        |           |              |            |            | Tmem106b -/- vs. Grn -/-             | -189.7                                 | -400.9 to 21.47    | No               | ns      | 0.0792           |         |
|        |         |                  |        |         |              |         |          |        |           |              |            |            |                                      | Tmem106b -/- vs. Grn -/ & Tmem106b -/- | -338.8             | -550.0 to -127.6 | Yes     | **               | 0.0039  |
|        |         |                  |        |         |              |         |          |        |           |              |            |            |                                      | Grn -/- vs. Grn -/ & Tmem106b -/-      | -149.1             | -360.3 to 62.07  | No      | ns               | 0.1867  |
