# Supplementary material for: Loss of TMEM106B potentiates lysosomal and FTLD‐like pathology in progranulin‐deficient mice
Source: PubMed Central journal article supplement — EMBO Rep. 2020 Sep 14;21(10):e50241. doi: 10.15252/embr.202050241 (PMC7534633; doi:10.15252/embr.202050241), 2020-09-14
Supplement: EMBR-21-e50241-s009.pdf [file EMBR-21-e50241-s009.pdf]

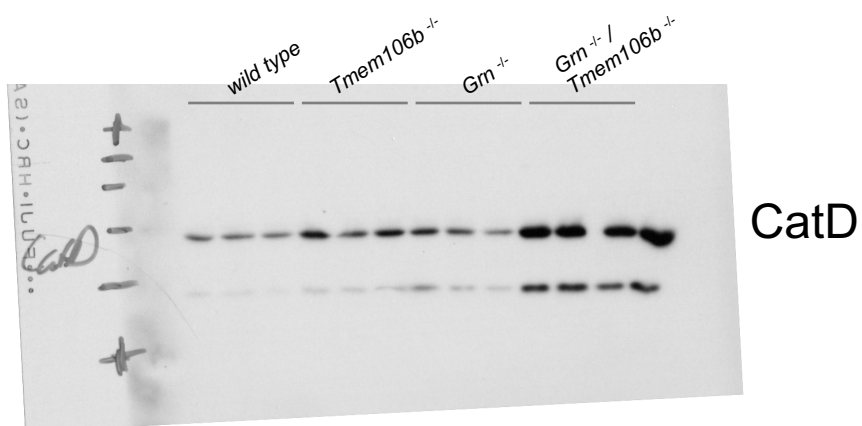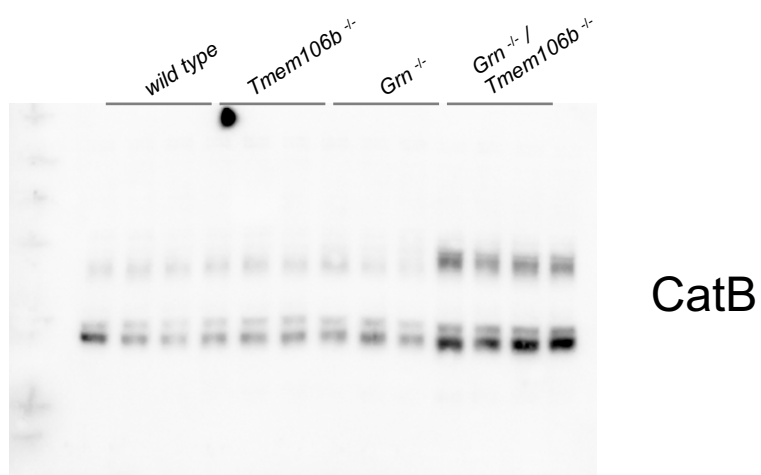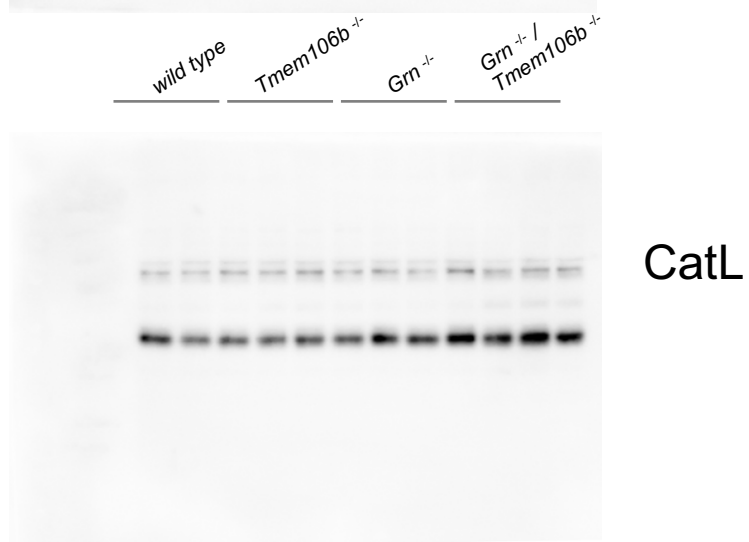

| Figure | Protein  | Normalized to WT |        |         |              | Protein     | Raw Data   |            |            |              |                                         |            |                    |              |         |                  |
|--------|----------|------------------|--------|---------|--------------|-------------|------------|------------|------------|--------------|-----------------------------------------|------------|--------------------|--------------|---------|------------------|
| 6      | CatD pro | WT               | TM -/- | GRN -/- | GRN & TM -/- | CatD pro    | WT         | TM -/-     | GRN -/-    | GRN & TM -/- | Tukey's multiple comparisons test       | Mean Diff. | 95.00% CI of diff. | Significant? | Summary | Adjusted P Value |
|        | A        | 107              | 163    | 156     | 435          | A           | 4.806.452  | 7.329.632  | 7.031.741  | 19.594.508   | wild type vs. Tmem106b -/-              | -63.95     | -140.8 to 12.94    | No           | ns      | 0.1069           |
|        | B        | 104              | 126    | 120     | 386          | B           | 4.698.608  | 5.657.605  | 5.409.668  | 17.379.535   | wild type vs. Grn -/-                   | -22.9      | -99.78 to 53.99    | No           | ns      | 0.7782           |
|        | C        | 89               | 204    | 93      | 436          | C           | 4.012.822  | 9.175.207  | 4.171.659  | 19.654.629   | wild type vs. Grn -/- & Tmem106b -/-    | -318.9     | -395.8 to -242.0   | Yes          | ****    | <0.0001          |
|        |          |                  |        |         |              |             |            |            |            |              | Tmem106b -/- vs. Grn -/-                | 41.05      | -35.83 to 117.9    | No           | ns      | 0.3786           |
|        |          |                  |        |         |              |             |            |            |            |              | Tmem106b -/- vs. Grn -/- & Tmem106b -/- | -255       | -331.9 to -178.1   | Yes          | ****    | <0.0001          |
|        |          |                  |        |         |              |             |            |            |            |              | Grn -/- vs. Grn -/- & Tmem106b -/-      | -296       | -372.9 to -219.1   | Yes          | ****    | <0.0001          |
| 6      | CatD hc  | WT               | TM -/- | GRN -/- | GRN & TM -/- | CatD mat    | WT         | TM -/-     | GRN -/-    | GRN & TM -/- | Tukey's multiple comparisons test       | Mean Diff. | 95.00% CI of diff. | Significant? | Summary | Adjusted P Value |
|        | A        | 176              | 122    | 343     | 1,014        | A           | 1.160.322  | 803.631    | 2.264.175  | 6.698.632    | wild type vs. Tmem106b -/-              | -39.46     | -166.1 to 87.21    | No           | ns      | 0.7551           |
|        | B        | 100              | 142    | 310     | 1,000        | B           | 663.748    | 935.485    | 2.048.410  | 6.608.073    | wild type vs. Grn -/-                   | -196.1     | -322.8 to -69.44   | Yes          | **      | 0.0049           |
|        | C        | 24               | 155    | 236     | 977          | C           | 158.702    | 1.026.073  | 1.558.487  | 6.460.434    | wild type vs. Grn -/- & Tmem106b -/-    | -896.9     | -1024 to -770.3    | Yes          | ****    | <0.0001          |
|        |          |                  |        |         |              |             |            |            |            |              | Tmem106b -/- vs. Grn -/-                | -156.6     | -283.3 to -29.98   | Yes          | *       | 0.0176           |
|        |          |                  |        |         |              |             |            |            |            |              | Tmem106b -/- vs. Grn -/- & Tmem106b -/- | -857.5     | -984.2 to -730.8   | Yes          | ****    | <0.0001          |
|        |          |                  |        |         |              |             |            |            |            |              | Grn -/- vs. Grn -/- & Tmem106b -/-      | -700.8     | -827.5 to -574.2   | Yes          | ****    | <0.0001          |
| 6      | CatB pro | WT               | TM -/- | GRN -/- | GRN & TM -/- | CatB upper  | WT         | TM -/-     | GRN -/-    | GRN & TM -/- | Tukey's multiple comparisons test       | Mean Diff. | 95.00% CI of diff. | Significant? | Summary | Adjusted P Value |
|        | A        | 98               | 108    | 152     | 625          | A           | 2.255.681  | 2.494.929  | 3.489.328  | 18.372.499   | wild type vs. Tmem106b -/-              | -11.44     | -148.4 to 125.5    | No           | ns      | 0.9928           |
|        | B        | 104              | 126    | 89      | 430          | B           | 2.387.394  | 2.898.404  | 2.647.617  | 9.887.929    | wild type vs. Grn -/-                   | -10.19     | -147.2 to 126.8    | No           | ns      | 0.9949           |
|        | C        | 98               | 100    | 90      | 531          | C           | 2.260.340  | 2.299.595  | 2.069.770  | 12.219.868   | wild type vs. Grn -/- & Tmem106b -/-    | -428.4     | -565.4 to -291.5   | Yes          | ****    | <0.0001          |
|        |          |                  |        |         |              |             |            |            |            |              | Tmem106b -/- vs. Grn -/-                | 1.25       | -135.7 to 138.2    | No           | ns      | >0.9999          |
|        |          |                  |        |         |              |             |            |            |            |              | Tmem106b -/- vs. Grn -/- & Tmem106b -/- | -417       | -554.0 to -280.0   | Yes          | ****    | <0.0001          |
|        |          |                  |        |         |              |             |            |            |            |              | Grn -/- vs. Grn -/- & Tmem106b -/-      | -418.3     | -555.2 to -281.3   | Yes          | ****    | <0.0001          |
| 6      | CatB sc  | WT               | TM -/- | GRN -/- | GRN & TM -/- | CatB lower  | WT         | TM -/-     | GRN -/-    | GRN & TM -/- | Tukey's multiple comparisons test       | Mean Diff. | 95.00% CI of diff. | Significant? | Summary | Adjusted P Value |
|        | A        | 155              | 84     | 97      | 249          | A           | 13.525.188 | 7.346.178  | 8.478.516  | 21.661.937   | wild type vs. Tmem106b -/-              | 6.023      | -86.20 to 98.25    | No           | ns      | 0.9965           |
|        | B        | 88               | 99     | 129     | 212          | B           | 7.658.238  | 8.583.749  | 11.269.000 | 18.487.892   | wild type vs. Grn -/-                   | 1.42       | -90.81 to 93.65    | No           | ns      | >0.9999          |
|        | C        | 57               | 99     | 69      | 289          | C           | 4.951.532  | 8.630.426  | 6.015.899  | 25.204.912   | wild type vs. Grn -/- & Tmem106b -/-    | -150.1     | -242.3 to -57.84   | Yes          | **      | 0.0036           |
|        |          |                  |        |         |              |             |            |            |            |              | Tmem106b -/- vs. Grn -/-                | -4.603     | -96.83 to 87.62    | No           | ns      | 0.9984           |
|        |          |                  |        |         |              |             |            |            |            |              | Tmem106b -/- vs. Grn -/- & Tmem106b -/- | -156.1     | -248.3 to -63.86   | Yes          | **      | 0.0028           |
|        |          |                  |        |         |              |             |            |            |            |              | Grn -/- vs. Grn -/- & Tmem106b -/-      | -151.5     | -243.7 to -59.26   | Yes          | **      | 0.0034           |
| 6      | CatL pro | WT               | TM -/- | GRN -/- | GRN & TM -/- | CatL upper  | WT         | TM -/-     | GRN -/-    | GRN & TM -/- | Tukey's multiple comparisons test       | Mean Diff. | 95.00% CI of diff. | Significant? | Summary | Adjusted P Value |
|        | A        | 100              | 93     | 109     | 120          | A           | 7.062.509  | 6.554.945  | 7.702.314  | 8.439.082    | wild type vs. Tmem106b -/-              | -6         | -53.46 to 41.46    | No           | ns      | 0.9761           |
|        | B        | 92               | 121    | 93      | 142          | B           | 6.480.134  | 8.545.450  | 6.576.124  | 9.993.737    | wild type vs. Grn -/-                   | -17.67     | -65.13 to 29.80    | No           | ns      | 0.6481           |
|        | C        | 107              | 103    | 150     | 116          | C           | 7.561.338  | 7.252.167  | 10.549.781 | 8.138.586    | wild type vs. Grn -/- & Tmem106b -/-    | -26.33     | -73.80 to 21.13    | No           | ns      | 0.3494           |
|        |          |                  |        |         |              |             |            |            |            |              | Tmem106b -/- vs. Grn -/-                | -11.67     | -59.13 to 35.80    | No           | ns      | 0.8583           |
|        |          |                  |        |         |              |             |            |            |            |              | Tmem106b -/- vs. Grn -/- & Tmem106b -/- | -20.33     | -87.80 to 27.13    | No           | ns      | 0.5481           |
|        |          |                  |        |         |              |             |            |            |            |              | Grn -/- vs. Grn -/- & Tmem106b -/-      | -8.667     | -56.13 to 38.80    | No           | ns      | 0.9339           |
| 6      | CatL sc  | WT               | TM -/- | GRN -/- | GRN & TM -/- | CatL lower  | WT         | TM -/-     | GRN -/-    | GRN & TM -/- | Tukey's multiple comparisons test       | Mean Diff. | 95.00% CI of diff. | Significant? | Summary | Adjusted P Value |
|        | A        | 165              | 64     | 68      | 191          | A           | 2.162.050  | 841.573    | 888.674    | 2.510.866    | wild type vs. Tmem106b -/-              | 35.25      | -55.04 to 125.5    | No           | ns      | 0.6155           |
|        | B        | 91               | 69     | 67      | 232          | B           | 1.198.243  | 906.844    | 881.206    | 3.044.978    | wild type vs. Grn -/-                   | 19.67      | -70.62 to 110.0    | No           | ns      | 0.8952           |
|        | C        | 44               | 61     | 106     | 193          | C           | 577.557    | 801.386    | 1.393.457  | 2.530.811    | wild type vs. Grn -/- & Tmem106b -/-    | -105.4     | -195.7 to -15.07   | Yes          | *       | 0.0238           |
|        |          |                  |        |         |              |             |            |            |            |              | Tmem106b -/- vs. Grn -/-                | -15.58     | -105.9 to 74.71    | No           | ns      | 0.9433           |
|        |          |                  |        |         |              |             |            |            |            |              | Tmem106b -/- vs. Grn -/- & Tmem106b -/- | -140.6     | -230.9 to -50.32   | Yes          | **      | 0.0047           |
|        |          |                  |        |         |              |             |            |            |            |              | Grn -/- vs. Grn -/- & Tmem106b -/-      | -125       | -215.3 to -34.74   | Yes          | **      | 0.0094           |
| 6      | CatL hc  | WT               | TM -/- | GRN -/- | GRN & TM -/- | CatL middle | WT         | TM -/-     | GRN -/-    | GRN & TM -/- | Tukey's multiple comparisons test       | Mean Diff. | 95.00% CI of diff. | Significant? | Summary | Adjusted P Value |
|        | A        | 130              | 81     | 122     | 137          | A           | 28.383.367 | 17.637.561 | 26.581.915 | 29.971.904   | wild type vs. Tmem106b -/-              | 9.933      | -47.63 to 67.49    | No           | ns      | 0.9432           |
|        | B        | 81               | 96     | 123     | 185          | B           | 17.686.467 | 20.913.573 | 26.912.033 | 40.246.158   | wild type vs. Grn -/-                   | -34.5      | -92.06 to 23.06    | No           | ns      | 0.2927           |
|        | C        | 89               | 93     | 158     | 136          | C           | 19.346.553 | 20.365.816 | 34.494.488 | 29.685.360   | wild type vs. Grn -/- & Tmem106b -/-    | -52.72     | -110.3 to 4.839    | No           | ns      | 0.0731           |
|        |          |                  |        |         |              |             |            |            |            |              | Tmem106b -/- vs. Grn -/-                | -44.44     | -102.0 to 13.12    | No           | ns      | 0.1397           |
|        |          |                  |        |         |              |             |            |            |            |              | Tmem106b -/- vs. Grn -/- & Tmem106b -/- | -62.65     | -120.2 to -5.095   | Yes          | *       | 0.0336           |
|        |          |                  |        |         |              |             |            |            |            |              | Grn -/- vs. Grn -/- & Tmem106b -/-      | -18.22     | -75.78 to 39.34    | No           | ns      | 0.7466           |

# FIGURE 6 C

## CTSB assay

|                                                    | delta 60-1       | WT                 | TMEM106B KO  | GRN KO  | GRN KO x TMEM106B KO |        |
|----------------------------------------------------|------------------|--------------------|--------------|---------|----------------------|--------|
| A                                                  |                  |                    | 7,24         | 5,91    | 7,47                 | 7,49   |
| B                                                  |                  |                    | 5,66         | 5,34    | 6,30                 | 8,30   |
| C                                                  |                  |                    | 6,14         | 4,69    | 6,19                 | 10,04  |
|                                                    | normalized on wt | WT                 | TMEM106B KO  | GRN KO  | GRN KO x TMEM106B KO |        |
| A                                                  |                  |                    | 114,02       | 93,07   | 117,61               | 118,05 |
| B                                                  |                  |                    | 89,20        | 84,13   | 99,28                | 130,69 |
| C                                                  |                  |                    | 96,77        | 73,86   | 97,48                | 158,21 |
| Tukey's multiple comparisons test                  | Mean Diff,       | 95,00% CI of diff, | Significant? | Summary | Adjusted P Value     |        |
| <i>wild type vs. Tmem106b -/-</i>                  | 16,31            | -20,66 to 53,29    | No           | ns      | 0,5261               | A-B    |
| <i>wild type vs. Grn -/-</i>                       | -4,79            | -41,77 to 32,19    | No           | ns      | 0,9744               | A-C    |
| <i>wild type vs. Grn -/- &amp; Tmem106b -/-</i>    | -35,65           | -72,63 to 1,321    | No           | ns      | 0,0587               | A-D    |
| <i>Tmem106b -/- vs. Grn -/-</i>                    | -21,1            | -58,08 to 15,88    | No           | ns      | 0,3284               | B-C    |
| <i>Tmem106b -/- vs. Grn -/- &amp; Tmem106b -/-</i> | -51,96           | -88,94 to -14,99   | Yes          | **      | 0,0086               | B-D    |
| <i>Grn -/- vs. Grn -/- &amp; Tmem106b -/-</i>      | -30,86           | -67,84 to 6,111    | No           | ns      | 0,1055               | C-D    |

## CTSD assay

|                                                    | delta 60-1       | WT                 | TMEM106B KO  | GRN KO  | GRN KO x TMEM106B KO |        |
|----------------------------------------------------|------------------|--------------------|--------------|---------|----------------------|--------|
| A                                                  |                  |                    | 15,46        | 16,60   | 18,33                | 22,73  |
| B                                                  |                  |                    | 15,34        | 16,32   | 17,18                | 25,71  |
| C                                                  |                  |                    | 16,19        | 17,46   | 17,42                | 26,82  |
|                                                    | normalized on wt | WT                 | TMEM106B KO  | GRN KO  | GRN KO x TMEM106B KO |        |
| A                                                  |                  |                    | 98,70        | 105,96  | 117,01               | 145,11 |
| B                                                  |                  |                    | 97,95        | 104,19  | 109,70               | 164,15 |
| C                                                  |                  |                    | 103,35       | 111,49  | 111,21               | 171,24 |
| Tukey's multiple comparisons test                  | Mean Diff,       | 95,00% CI of diff, | Significant? | Summary | Adjusted P Value     |        |
| <i>wild type vs. Tmem106b -/-</i>                  | -7,215           | -26,63 to 12,20    | No           | ns      | 0,6493               | A-B    |
| <i>wild type vs. Grn -/-</i>                       | -12,64           | -32,06 to 6,779    | No           | ns      | 0,2365               | A-C    |
| <i>wild type vs. Grn -/- &amp; Tmem106b -/-</i>    | -60,17           | -79,59 to -40,75   | Yes          | ****    | <0,0001              | A-D    |
| <i>Tmem106b -/- vs. Grn -/-</i>                    | -5,425           | -24,84 to 13,99    | No           | ns      | 0,8081               | B-C    |
| <i>Tmem106b -/- vs. Grn -/- &amp; Tmem106b -/-</i> | -52,95           | -72,37 to -33,53   | Yes          | ***     | 0,0001               | B-D    |
| <i>Grn -/- vs. Grn -/- &amp; Tmem106b -/-</i>      | -47,53           | -66,95 to -28,11   | Yes          | ***     | 0,0002               | C-D    |

## CTSL assay

|                                                    | delta 60-1       | WT                 | TMEM106B KO  | GRN KO  | GRN KO x TMEM106B KO |        |
|----------------------------------------------------|------------------|--------------------|--------------|---------|----------------------|--------|
| A                                                  |                  |                    | 62,71        | 60,92   | 66,57                | 88,97  |
| B                                                  |                  |                    | 58,94        | 55,43   | 66,85                | 87,63  |
| C                                                  |                  |                    | 64,53        | 53,91   | 72,03                | 91,09  |
|                                                    | normalized on wt | WT                 | TMEM106B KO  | GRN KO  | GRN KO x TMEM106B KO |        |
| A                                                  |                  |                    | 101,04       | 98,16   | 107,27               | 143,35 |
| B                                                  |                  |                    | 94,97        | 89,31   | 107,71               | 141,20 |
| C                                                  |                  |                    | 103,98       | 86,86   | 116,07               | 146,78 |
| Tukey's multiple comparisons test                  | Mean Diff,       | 95,00% CI of diff, | Significant? | Summary | Adjusted P Value     |        |
| <i>wild type vs. Tmem106b -/-</i>                  | 8,558            | -3,769 to 20,89    | No           | ns      | 0,1965               | A-B    |
| <i>wild type vs. Grn -/-</i>                       | -10,35           | -22,68 to 1,979    | No           | ns      | 0,1033               | A-C    |
| <i>wild type vs. Grn -/- &amp; Tmem106b -/-</i>    | -43,78           | -56,11 to -31,45   | Yes          | ****    | <0,0001              | A-D    |
| <i>Tmem106b -/- vs. Grn -/-</i>                    | -18,91           | -31,23 to -6,579   | Yes          | **      | 0,0052               | B-C    |
| <i>Tmem106b -/- vs. Grn -/- &amp; Tmem106b -/-</i> | -52,34           | -64,66 to -40,01   | Yes          | ****    | <0,0001              | B-D    |
| <i>Grn -/- vs. Grn -/- &amp; Tmem106b -/-</i>      | -33,43           | -45,76 to -21,10   | Yes          | ***     | 0,0001               | C-D    |

Source data Figure 6
