# Supplementary material for: Loss of TMEM106B potentiates lysosomal and FTLD‐like pathology in progranulin‐deficient mice
Source: PubMed Central journal article supplement — EMBO Rep. 2020 Sep 14;21(10):e50241. doi: 10.15252/embr.202050241 (PMC7534633; doi:10.15252/embr.202050241), 2020-09-14
Supplement: EMBR-21-e50241-s010.pdf [file EMBR-21-e50241-s010.pdf]

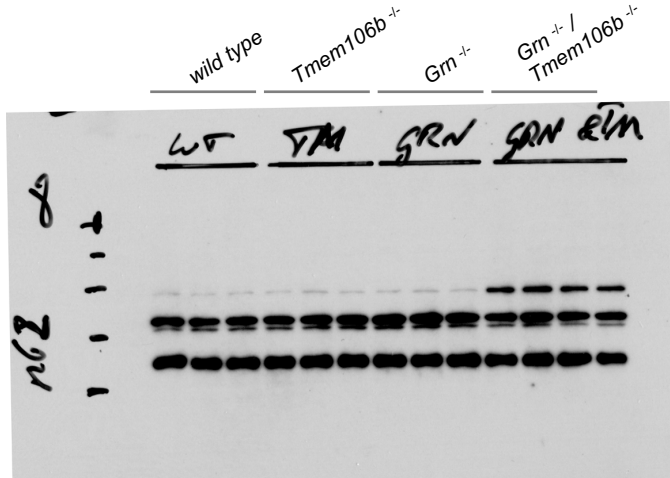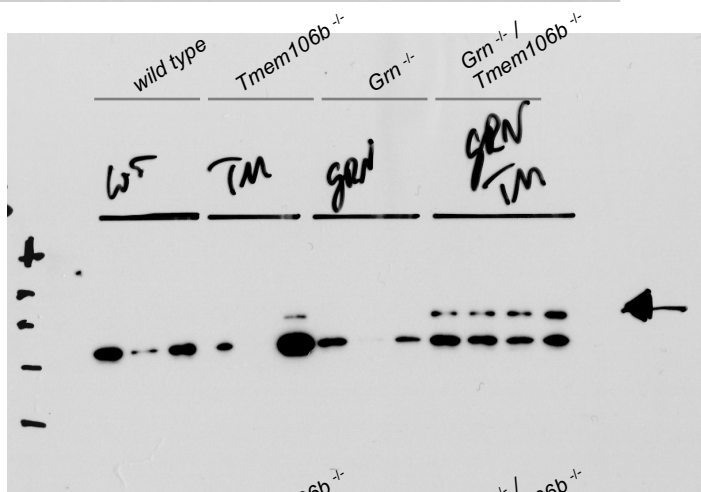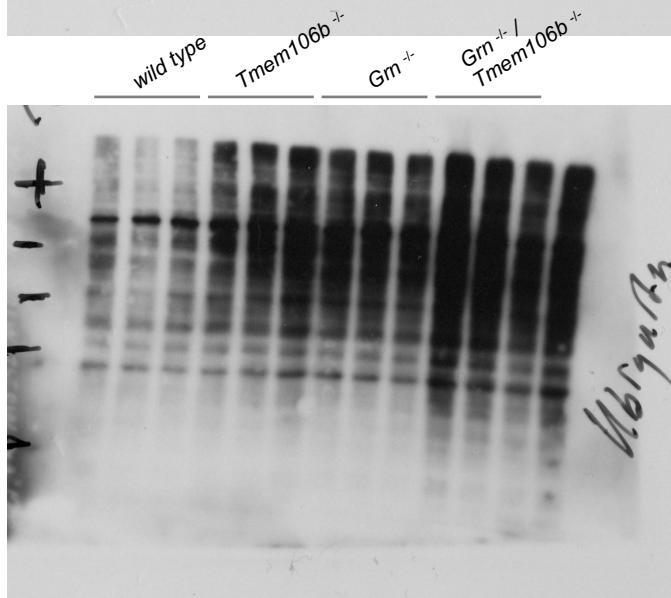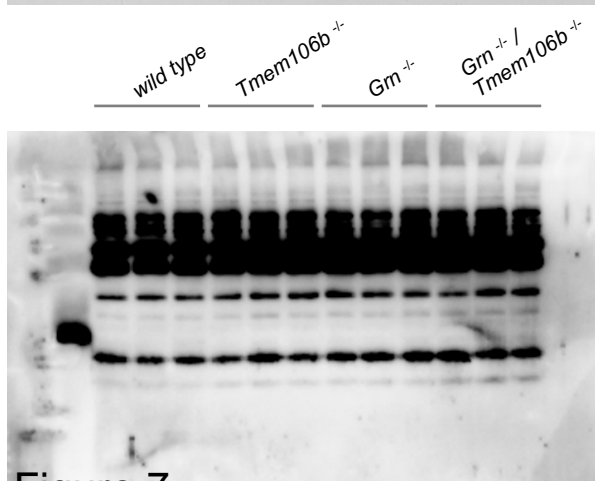

| Figure | Protein  | Normalized to WT |        |         |              | Protein   | Raw Data |             |             |              | Tukey's multiple comparisons test       | Mean Diff.                           | 95.00% CI of diff. | Significant?     | Summary | Adjusted P Value |            |
|--------|----------|------------------|--------|---------|--------------|-----------|----------|-------------|-------------|--------------|-----------------------------------------|--------------------------------------|--------------------|------------------|---------|------------------|------------|
|        |          | WT               | TM -/- | GRN -/- | GRN & TM -/- |           | WT       | TM -/-      | GRN -/-     | GRN & TM -/- |                                         |                                      |                    |                  |         |                  |            |
| 7      | p62 RIPA | WT               | TM -/- | GRN -/- | GRN & TM -/- | p62 upper | WT       | TM -/-      | GRN -/-     | GRN & TM -/- | wild type vs. Tmem106b -/-              | -20.36                               | -111.4 to 70.66    | No               | ns      | 0.8879           |            |
|        | A        |                  | 104    | 89      | 136          | 939       | A        | 267.931     | 228.936     | 351.035      | 2.417.550                               | wild type vs. Grn -/-                | -48.37             | -139.4 to 42.65  | No      | ns               | 0.3823     |
|        | B        |                  | 90     | 145     | 164          | 933       | B        | 233.067     | 372.469     | 423.115      | 2.402.762                               | wild type vs. Grn -/- & Tmem106b -/- | -800.8             | -891.8 to -709.8 | Yes     | ****             | <0.0001    |
|        | C        |                  | 105    | 127     | 144          | 830       | C        | 271.648     | 325.992     | 369.605      | 2.137.034                               | Tmem106b -/- vs. Grn -/-             | -28                | -119.0 to 63.02  | No      | ns               | 0.7617     |
|        |          |                  |        |         |              |           |          |             |             |              | Tmem106b -/- vs. Grn -/- & Tmem106b -/- | -780.4                               | -871.5 to -689.4   | Yes              | ****    | <0.0001          |            |
|        |          |                  |        |         |              |           |          |             |             |              | Grn -/- vs. Grn -/- & Tmem106b -/-      | -752.4                               | -843.4 to -661.4   | Yes              | ****    | <0.0001          |            |
| 7      | p62-Urea | WT               | TM -/- | GRN -/- | GRN & TM -/- | p62-Urea  | WT       | TM -/-      | GRN -/-     | GRN & TM -/- | Tukey's multiple comparisons test       | Mean Diff.                           | 95.00% CI of diff. | Significant?     | Summary | Adjusted P Value |            |
|        | A        |                  | 138    | 308     | 228          | 2.462     | A        | 693.836     | 1.553.493   | 1.150.906    | 12.419.388                              | wild type vs. Tmem106b -/-           | -674.3             | -2016 to 667.0   | No      | ns               | 0.4251 A-B |
|        | B        |                  | 18     | 123     | 31           | 2.867     | B        | 90.311      | 622.696     | 157.268      | 14.460.078                              | wild type vs. Grn -/-                | -33.74             | -1375 to 1307    | No      | ns               | 0.9998 A-C |
|        | C        |                  | 145    | 1.892   | 143          | 3.056     | C        | 728.945     | 9.544.508   | 720.439      | 15.415.560                              | wild type vs. Grn -/- & Tmem106b -/- | -2695              | -4036 to -1354   | Yes     | ***              | 0.0009 A-D |
|        |          |                  |        |         |              |           |          |             |             |              | Tmem106b -/- vs. Grn -/-                | 640.5                                | -700.7 to 1982     | No               | ns      | 0.465 B-C        |            |
|        |          |                  |        |         |              |           |          |             |             |              | Tmem106b -/- vs. Grn -/- & Tmem106b -/- | -2021                                | -3362 to -679.4    | Yes              | **      | 0.0057 B-D       |            |
|        |          |                  |        |         |              |           |          |             |             |              | Grn -/- vs. Grn -/- & Tmem106b -/-      | -2661                                | -4002 to -1320     | Yes              | ***     | 0.001 C-D        |            |
| 7      | UBI      | WT               | TM -/- | GRN -/- | GRN & TM -/- | UBI       | WT       | TM -/-      | GRN -/-     | GRN & TM -/- | Tukey's multiple comparisons test       | Mean Diff.                           | 95.00% CI of diff. | Significant?     | Summary | Adjusted P Value |            |
|        | A        |                  | 128    | 174     | 234          | 312       | A        | 133.780.202 | 181.486.908 | 244.375.525  | 324.924.739                             | wild type vs. Tmem106b -/-           | -123.4             | -216.5 to -30.19 | Yes     | *                | 0.0121     |
|        | B        |                  | 70     | 209     | 219          | 302       | B        | 73.336.954  | 218.290.855 | 228.588.160  | 315.221.833                             | wild type vs. Grn -/-                | -119.7             | -212.8 to -26.49 | Yes     | *                | 0.0143     |
|        | C        |                  | 101    | 285     | 204          | 260       | C        | 105.549.008 | 297.543.467 | 212.767.594  | 270.782.637                             | wild type vs. Grn -/- & Tmem106b -/- | -191.7             | -284.8 to -98.51 | Yes     | ***              | 0.0008     |
|        |          |                  |        |         |              |           |          |             |             |              | Tmem106b -/- vs. Grn -/-                | 3.703                                | -89.46 to 96.87    | No               | ns      | 0.9992           |            |
|        |          |                  |        |         |              |           |          |             |             |              | Tmem106b -/- vs. Grn -/- & Tmem106b -/- | -68.32                               | -161.5 to 24.85    | No               | ns      | 0.1658           |            |
|        |          |                  |        |         |              |           |          |             |             |              | Grn -/- vs. Grn -/- & Tmem106b -/-      | -72.02                               | -165.2 to 21.14    | No               | ns      | 0.1391           |            |
| 7      | LC3-I    | WT               | TM -/- | GRN -/- | GRN & TM -/- | LC3-I     | WT       | TM -/-      | GRN -/-     | GRN & TM -/- | Tukey's multiple comparisons test       | Mean Diff.                           | 95.00% CI of diff. | Significant?     | Summary | Adjusted P Value |            |
|        | A        |                  | 123    | 77      | 105          | 159       | A        | 37.258.577  | 23.253.226  | 31.963.062   | 48.251.136                              | wild type vs. Tmem106b -/-           | 5.517              | -42.87 to 53.90  | No      | ns               | 0.9822     |
|        | B        |                  | 85     | 117     | 126          | 177       | B        | 25.819.264  | 35.608.370  | 38.296.582   | 53.739.827                              | wild type vs. Grn -/-                | -24.09             | -72.48 to 24.29  | No      | ns               | 0.4326     |
|        | C        |                  | 92     | 90      | 141          | 148       | C        | 28.051.494  | 27.242.340  | 42.828.545   | 45.098.913                              | wild type vs. Grn -/- & Tmem106b -/- | -61.41             | -109.8 to -13.02 | Yes     | *                | 0.0153     |
|        |          |                  |        |         |              |           |          |             |             |              | Tmem106b -/- vs. Grn -/-                | -29.61                               | -79.00 to 18.78    | No               | ns      | 0.2781           |            |
|        |          |                  |        |         |              |           |          |             |             |              | Tmem106b -/- vs. Grn -/- & Tmem106b -/- | -66.92                               | -115.3 to -18.54   | Yes              | **      | 0.0095           |            |
|        |          |                  |        |         |              |           |          |             |             |              | Grn -/- vs. Grn -/- & Tmem106b -/-      | -37.31                               | -85.70 to 11.07    | No               | ns      | 0.1402           |            |
| 7      | LC3-II   | WT               | TM -/- | GRN -/- | GRN & TM -/- | LC3-II    | WT       | TM -/-      | GRN -/-     | GRN & TM -/- | Tukey's multiple comparisons test       | Mean Diff.                           | 95.00% CI of diff. | Significant?     | Summary | Adjusted P Value |            |
|        | A        |                  | 135    | 22      | 14           | 254       | A        | 5.759.224   | 936.573     | 606.518      | 10.796.360                              | wild type vs. Tmem106b -/-           | 75.77              | -28.83 to 180.4  | No      | ns               | 0.1724     |
|        | B        |                  | 118    | 32      | 35           | 293       | B        | 5.008.745   | 1.343.219   | 1.470.471    | 12.484.246                              | wild type vs. Grn -/-                | 51.61              | -52.99 to 156.2  | No      | ns               | 0.4397     |
|        | C        |                  | 47     | 19      | 96           | 350       | C        | 1.994.050   | 811.791     | 4.097.838    | 14.902.299                              | wild type vs. Grn -/- & Tmem106b -/- | -199.2             | -303.8 to -94.58 | Yes     | **               | 0.0013     |
|        |          |                  |        |         |              |           |          |             |             |              | Tmem106b -/- vs. Grn -/-                | -24.16                               | -128.8 to 80.45    | No               | ns      | 0.8785           |            |
|        |          |                  |        |         |              |           |          |             |             |              | Tmem106b -/- vs. Grn -/- & Tmem106b -/- | -275                                 | -379.6 to -170.4   | Yes              | ***     | 0.0001           |            |
|        |          |                  |        |         |              |           |          |             |             |              | Grn -/- vs. Grn -/- & Tmem106b -/-      | -250.8                               | -355.4 to -146.2   | Yes              | ***     | 0.0003           |            |
