# Supplementary material for: Loss of TMEM106B potentiates lysosomal and FTLD‐like pathology in progranulin‐deficient mice
Source: PubMed Central journal article supplement — EMBO Rep. 2020 Sep 14;21(10):e50241. doi: 10.15252/embr.202050241 (PMC7534633; doi:10.15252/embr.202050241), 2020-09-14
Supplement: EMBR-21-e50241-s011.pdf [file EMBR-21-e50241-s011.pdf]

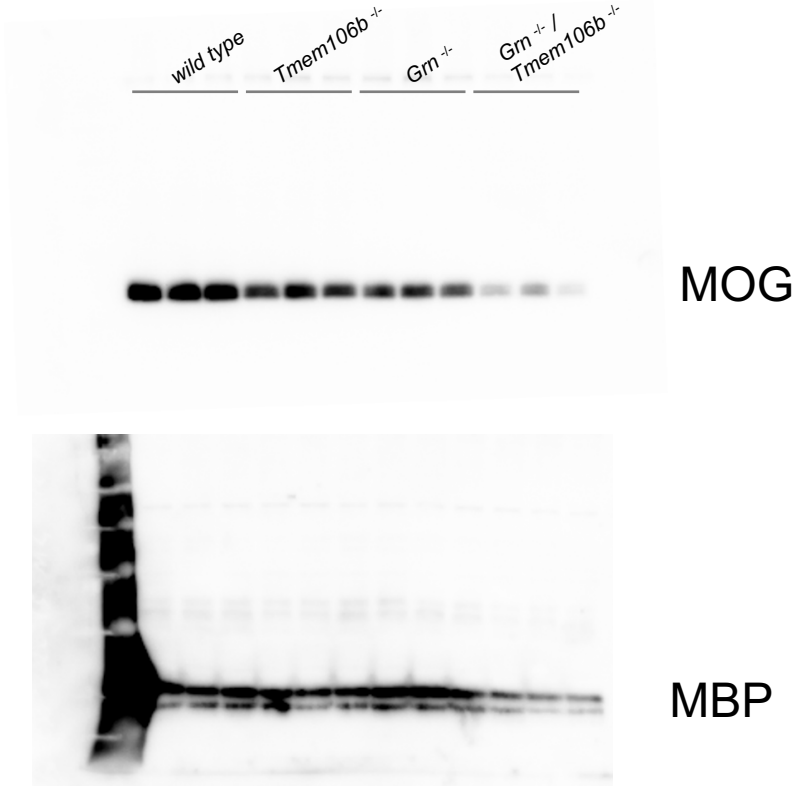

| Figure | Protein | Normalized to WT |                   |                    |                         | Protein | Raw Data   |                   |                    |                         |                                                                          |            |                    |              |         |                  |
|--------|---------|------------------|-------------------|--------------------|-------------------------|---------|------------|-------------------|--------------------|-------------------------|--------------------------------------------------------------------------|------------|--------------------|--------------|---------|------------------|
| EV. 1  | MBP     | WT               | TM <sup>-/-</sup> | GRN <sup>-/-</sup> | GRN & TM <sup>-/-</sup> | MBP     | WT         | TM <sup>-/-</sup> | GRN <sup>-/-</sup> | GRN & TM <sup>-/-</sup> | Tukey's multiple comparisons test                                        | Mean Diff. | 95.00% CI of diff. | Significant? | Summary | Adjusted P Value |
|        | A       |                  | 86                | 127                | 132                     | 67      | 8,498,722  | 12,561,043        | 13,030,682         | 6,621,246               | wild type vs. Tmem106b <sup>-/-</sup>                                    | 3,233      | -56.39 to 62.86    | No           | ns      | 0.998            |
|        | B       |                  | 96                | 73                 | 146                     | 26      | 9,509,514  | 7,192,754         | 14,583,151         | 2,531,595               | wild type vs. Grn <sup>-/-</sup>                                         | -28.7      | -88.32 to 30.92    | No           | ns      | 0.4589           |
|        | C       |                  | 118               | 90                 | 107                     | 22      | 11,644,788 | 8,938,483         | 10,554,959         | 2,180,994               | wild type vs. Grn <sup>-/-</sup> & Tmem106b <sup>-/-</sup>               | 61.87      | 2,242 to 121.5     | Yes          | *       | 0.0422           |
|        |         |                  |                   |                    |                         |         |            |                   |                    |                         | Tmem106b <sup>-/-</sup> vs. Grn <sup>-/-</sup>                           | -31.93     | -91.56 to 27.69    | No           | ns      | 0.3763           |
|        |         |                  |                   |                    |                         |         |            |                   |                    |                         | Tmem106b <sup>-/-</sup> vs. Grn <sup>-/-</sup> & Tmem106b <sup>-/-</sup> | 58.63      | -0.9915 to 118.3   | No           | ns      | 0.0539           |
|        |         |                  |                   |                    |                         |         |            |                   |                    |                         | Grn <sup>-/-</sup> vs. Grn <sup>-/-</sup> & Tmem106b <sup>-/-</sup>      | 90.57      | 30.94 to 150.2     | Yes          | **      | 0.0055           |
| EV. 1  | MOG     | WT               | TM <sup>-/-</sup> | GRN <sup>-/-</sup> | GRN & TM <sup>-/-</sup> | MOG     | WT         | TM <sup>-/-</sup> | GRN <sup>-/-</sup> | GRN & TM <sup>-/-</sup> | Tukey's multiple comparisons test                                        | Mean Diff. | 95.00% CI of diff. | Significant? | Summary | Adjusted P Value |
|        | A       |                  | 102               | 63                 | 53                      | 12      | 64,350,578 | 39,996,310        | 33,806,839         | 7,695,234               | wild type vs. Tmem106b <sup>-/-</sup>                                    | 32.43      | 15.73 to 49.14     | Yes          | **      | 0.0011           |
|        | B       |                  | 100               | 77                 | 58                      | 17      | 63,566,814 | 48,942,075        | 36,506,344         | 10,625,348              | wild type vs. Grn <sup>-/-</sup>                                         | 48.5       | 31.79 to 65.21     | Yes          | ****    | <0.0001          |
|        | C       |                  | 98                | 62                 | 43                      | 5       | 62,188,971 | 39,500,811        | 27,548,522         | 2,941,999               | wild type vs. Grn <sup>-/-</sup> & Tmem106b <sup>-/-</sup>               | 88.8       | 72.09 to 105.5     | Yes          | ****    | <0.0001          |
|        |         |                  |                   |                    |                         |         |            |                   |                    |                         | Tmem106b <sup>-/-</sup> vs. Grn <sup>-/-</sup>                           | 16.07      | -0.6400 to 32.77   | No           | ns      | 0.0594           |
|        |         |                  |                   |                    |                         |         |            |                   |                    |                         | Tmem106b <sup>-/-</sup> vs. Grn <sup>-/-</sup> & Tmem106b <sup>-/-</sup> | 56.37      | 39.66 to 73.07     | Yes          | ****    | <0.0001          |
|        |         |                  |                   |                    |                         |         |            |                   |                    |                         | Grn <sup>-/-</sup> vs. Grn <sup>-/-</sup> & Tmem106b <sup>-/-</sup>      | 40.3       | 23.59 to 57.01     | Yes          | ***     | 0.0003           |
